1 **FRONT MATTER**

2  
3 **Hawks pursuing targets through clutter avoid obstacles by applying open loop steering**  
4 **corrections during closed loop pursuit**

5  
6 **Short title:** Open loop obstacle avoidance in closed loop pursuit

7  
8 **Authors**

9  
10 Caroline H. Brighton<sup>1</sup>, James A. Kempton<sup>1</sup>, Lydia A. France<sup>1,2</sup>, Marco KleinHeerenbrink<sup>1</sup>,  
11 Sofia Miñano<sup>1,3</sup> and Graham K. Taylor<sup>1\*</sup>

12  
13 **Affiliations**

14  
15 <sup>1</sup>Department of Biology, University of Oxford, OX1 3SZ, UK

16 <sup>2</sup>The Alan Turing Institute, London, NW1 2DB, UK

17 <sup>3</sup>Advanced Research Computing Centre, University College, London, WC1E 6BT

18 \*[graham.taylor@biology.ox.ac.uk](mailto:graham.taylor@biology.ox.ac.uk)

19  
20  
21 **Abstract**

22  
23 Pursuing prey through clutter is a complex and risky activity requiring integration of guidance  
24 subsystems for obstacle avoidance and target pursuit. The unobstructed pursuit trajectories of  
25 Harris' hawks *Parabuteo unicinctus* are well modelled by a mixed guidance law feeding back target  
26 deviation angle and line-of-sight rate. Here we ask how their closed-loop pursuit behavior is  
27 modified in response to obstacles, using high-speed motion capture to reconstruct flight trajectories  
28 recorded during obstructed pursuit of maneuvering targets. We find that their trajectories are well  
29 modelled by the same mixed guidance law identified previously, which produces a tail-chasing  
30 behavior that promotes implicit obstacle avoidance when led by a target that is itself avoiding  
31 clutter. When presented with obstacles blocking their path, hawks resolve the pursuit-avoidance  
32 conflict by applying a bias command that is well modelled as an open-loop steering correction  
33 aiming at a clearance of one wing length from an upcoming obstacle.

34  
35 **Teaser:** Raptors resolve the conflict between obstacle avoidance and prey pursuit by applying  
36 intermittent bias commands to steer flight.

## 37 MAIN TEXT

### 38 Introduction

39  
40  
41 Obstacle avoidance and prey pursuit are challenging guidance behaviors for any fast-moving  
42 animal, but their interaction must be even more so. For predators hunting in clutter, the demands of  
43 these two tasks will often be in conflict, requiring effective prioritization to avoid either a dangerous  
44 collision or loss of the target. Here we ask how the competing demands of obstacle avoidance and  
45 prey pursuit are reconciled in aerial predators adapted to hunting close to the ground. We answer  
46 this question experimentally for Harris' hawks *Parabuteo unicinctus* pursuing a maneuvering target  
47 in a motion capture lab with vertical obstacles. This is an excellent model for studying pursuit-  
48 avoidance, because the target pursuit behavior of Harris' hawks is already well characterized [1],  
49 and their natural mode of hunting involves short flights targeting ground-dwelling prey in cluttered  
50 habitats [2]. Understanding how animals evolve and/or learn to respond to these coupled challenges  
51 may inform the design of future autonomous systems tackling a broad range of related problems,  
52 including drones designed to intercept other drones in clutter.

53 Current technical approaches to obstacle avoidance rely mainly on path planning. For  
54 instance, a robot may avoid mapped obstacles in its environment by solving for a feasible path to  
55 its goal that minimizes some specified cost function. Such approaches are unlikely to be effective  
56 when chasing targets, however, because effective pursuit requires closed-loop guidance, and clutter  
57 need only be avoided if it appears on the pursuer's resulting path. Obstacle avoidance is therefore  
58 expected to be implemented reactively during prey pursuit. Hypothetically, there are two ways in  
59 which obstacle avoidance and target pursuit might be combined. One possibility is that the pursuit  
60 and avoidance subsystems could each be used to compute their own closed-loop steering  
61 commands, which would be superposed to address the needs of both tasks continuously. The  
62 trajectories of humans walking around an obstacle to reach a stationary goal [3], and of robber flies  
63 intercepting an obstructed moving target [4], have both been modelled in this way. A second  
64 possibility is that the pursuit subsystem could be used to generate a closed-loop steering command,  
65 and the avoidance subsystem to make occasional open-loop corrections to flight direction when  
66 required. In this case, the attacker's obstacle avoidance response would have the same effect on its  
67 pursuit behavior as a gust or other external perturbation.

68 Previous work on Harris' hawks chasing maneuvering targets in the open [1] has found that  
69 their trajectories are well modelled by turning commanded at an angular rate:

$$\dot{\gamma}(t) = N\dot{\lambda}(t - \tau) - K\delta(t - \tau) \quad (1)$$

70  
71  
72  
73 with fitted guidance constants  $N = 0.7$ ,  $K = 1.2 \text{ s}^{-1}$  and delay  $\tau = 0.09 \text{ s}$ , where  $\dot{\lambda}$  is the angular  
74 rate of the line-of-sight from the pursuer to the target, where  $\delta$  is the signed deviation angle between  
75 the pursuer's flight direction and its line-of-sight to the target, and where  $t$  is time. Because this  
76 mixed guidance law feeds back the deviation angle  $\delta$  in addition to the line-of-sight rate  $\dot{\lambda}$ , it  
77 produces a characteristic tail-chasing behavior as  $\delta \rightarrow 0$  that is expected to promote a safe path  
78 through clutter that the target avoids [1]. This property is not necessarily shared by other guidance  
79 laws. For instance, setting  $K = 0$  in Eq. 1 results in a simpler guidance law called proportional  
80 navigation, which has been shown to model the attack trajectories of peregrine falcons *Falco*  
81 *peregrinus* successfully [5] at a fitted guidance constant of  $N \approx 3$ . Proportional navigation  
82 produces a characteristic interception behavior that is effective in heading off targets in the open  
83 [6], but which risks hitting obstacles that a target avoids in clutter. Here we test how well the mixed  
84 guidance law of Eq. 1 models Harris' hawk pursuit in the presence of obstacles, testing its  
85 predictions in isolation and in combination with either open- or closed-loop obstacle avoidance.

## 87 Results

88  
89 We used a high-speed motion capture system to reconstruct the flight trajectories of  $N = 4$  Harris'  
90 hawks chasing a food lure towed along an unpredictable path about a series of pulleys, within a  
91 large indoor flight hall with or without obstacles (Fig. 1A). We used two rows of hanging ropes as  
92 obstacles: the first forming a dense clump that the bird was forced to fly around (Fig. 1B), and the  
93 second simulating a row of trees that the bird was forced to fly between (Fig. 1B). The full dataset  
94 contains the following subsets: (i)  $n=128$  obstacle-free training flights collected over 8 days;  
95 followed by (ii)  $n=16$  obstacle familiarization flights collected the next day; then (iii) a set of  $n=106$   
96 obstacle-free test flights; and (iv) a set of  $n=154$  obstacle test flights; where (iii) and (iv) were  
97 collected over 15 days on which the presence or absence of obstacles was randomized (see Materials  
98 and Methods for details). The  $n=106$  obstacle-free test flights are reported and included in an  
99 analysis of unobstructed pursuit elsewhere [7], but the flights with obstacles are described here for  
100 the first time. We simulated the measured data computationally using several alternative models of  
101 the guidance dynamics, matching the hawk's simulated flight speed to its measured flight speed,  
102 and modelling its horizontal turning behavior using the mixed guidance law in Eq. 1 or a variant  
103 thereof. The measured trajectory of the lure was taken as a given, and the initial conditions of each  
104 simulation were either matched to the measured data or else modelled explicitly.

### 105 106 107 *Validation of the mixed guidance law in unobstructed pursuit*

108  
109 Our previous work [1] had identified the mixed guidance law of Eq. 1 as the best-supported model  
110 of unobstructed pursuit in Harris' hawks, for a sample of  $n=50$  flights from  $N=5$  birds of which one  
111 individual was also represented in the present study. We therefore begin by treating our new sample  
112 of  $n=128$  obstacle-free training flights as a validation dataset for the mixed guidance law fitted  
113 previously [1]. We define the model prediction error,  $\varepsilon(t)$ , as the distance between the measured  
114 and simulated trajectories, which we summarize by reporting the mean prediction error ( $\bar{\varepsilon}$ ) for each  
115 flight, and its median ( $\tilde{\varepsilon}$ ) over all the flights within a subset. Simulating the obstacle-free training  
116 flights using the original published parameter settings [1] of  $N = 0.7$ ,  $K = 1.2 \text{ s}^{-1}$  and  $\tau = 0.09 \text{ s}$   
117 generally resulted in a low mean prediction error, with a median of  $\tilde{\varepsilon} = 0.22 \text{ m}$  over the  $n=128$   
118 flights (95% CI: 0.20, 0.28 m). By comparison, the median over the  $n=50$  obstacle-free flights to  
119 which the mixed guidance law had originally been fitted was  $\tilde{\varepsilon} = 0.34 \text{ m}$  (95% CI: 0.24, 0.53 m).  
120 The original mixed guidance law [1] therefore models our sample of  $n=128$  obstacle-free training  
121 flights at least as well as the sample of  $n=50$  outdoor flights to which it was fitted, confirming its  
122 suitability as a model of unobstructed pursuit behavior in Harris' hawks.

### 123 124 125 *Validation of the mixed guidance law in obstructed pursuit*

126  
127 The original version of the mixed guidance law produces a characteristic tail-chasing behavior that  
128 could be expected to lead a pursuer along a safe path when following a target finding its own way  
129 through clutter [1]. As the lure travelled through the gaps between obstacles on the  $n=16$  obstacle  
130 familiarization flights, we tested this prediction by simulating these flights at the original parameter  
131 settings [1] of  $N = 0.7$ ,  $K = 1.2 \text{ s}^{-1}$  and  $\tau = 0.09 \text{ s}$  (Fig. 2A). Although the model does not always  
132 predict the hawk's turning behavior closely at the point of capture, it predicts the earlier sections of  
133 each flight well, following the lure through the gaps between obstacles (Fig. 2A). The target pursuit  
134 subsystem that Eq. 1 describes is therefore capable of producing a safe path through clutter when  
135 chasing a target that passes safely between obstacles itself. This implicit obstacle avoidance  
136 behavior is insufficient to guarantee that every pursuit flight will be free of collisions, however, so

137 it is reasonable to assume that Harris' hawks will also use explicit obstacle avoidance. To promote  
138 the engagement of this obstacle avoidance subsystem, we set the lure to run beneath – rather than  
139 between – the ropes on the obstacle test flights, thereby placing target pursuit and obstacle  
140 avoidance in conflict.

### 141 142 143 ***Refinement of the mixed guidance law in unobstructed and obstructed pursuit*** 144

145 We next refined the parameters of the mixed guidance law (Eq. 1) in relation to the n=260 test  
146 flights that we recorded. For direct comparability with the results of our modelling using the original  
147 mixed guidance law [1], all of our simulations begin from 0.09 s after the start of each recording,  
148 allowing for a sensorimotor delay of  $\tau \leq 0.09$  s. We began by fitting separate models to the test  
149 flights with and without obstacles, finding the guidance parameter settings that minimized the  
150 median of the mean prediction error,  $\tilde{\epsilon}$ , over each subset of flights (see Materials and Methods).  
151 However, as the optimized parameters were similar for each subset ( $N = 0.75$ ,  $K = 1.15 \text{ s}^{-1}$  and  
152  $\tau = 0.005$  s for the n=106 obstacle-free test flights;  $N = 0.75$ ,  $K = 1.15 \text{ s}^{-1}$  and  $\tau = 0.015$  s for  
153 the n=154 obstacle test flights), and were close to those fitted in previous work [1], we re-fitted the  
154 model to the union of the test flights with and without obstacles, yielding refined parameter settings  
155 of  $N = 0.75$ ,  $K = 1.25 \text{ s}^{-1}$  and  $\tau = 0.010$  s (Fig. 2B,C). Because flights with obstacles are  
156 overrepresented in this sample relative to flights without obstacles, we used a subsampling  
157 procedure in which we randomly subsampled 80 flights without replacement from each subset and  
158 identified the parameter settings that minimized  $\tilde{\epsilon}$  over that subsample (see Materials and Methods).  
159 We repeated this sampling experiment 100,000 times and took the median of the best-fitting  
160 parameter settings as our refined model. The goodness of fit of this refined model was similar for  
161 the n=106 obstacle-free test flights ( $\tilde{\epsilon} = 0.14$  m; 95% CI: 0.12, 0.19 m; Fig. 2B) and the n=154  
162 obstacle test flights ( $\tilde{\epsilon} = 0.16$  m; 95% CI: 0.14, 0.21 m; Fig. 2C), and it performed marginally  
163 better on the validation data from the n=128 obstacle-free training flights ( $\tilde{\epsilon} = 0.21$  m; 95% CI:  
164 0.17, 0.26 m) than the original version of the mixed guidance law [1]. We therefore take the refined  
165 mixed guidance law as our best-supported model of the target pursuit subsystem of Harris' hawks.

### 166 167 168 ***Take-off direction is biased to avoid the first obstacle*** 169

170 The refined mixed guidance law usually predicted a collision-free path around the first row of  
171 obstacles (Fig. 2C). This result reflects the fact that our simulations were initialized using the bird's  
172 measured take-off velocity. Hence, if the hawk set its take-off direction to avoid the first set of  
173 obstacles, then the resulting bias in the initial value of its deviation angle  $\delta$  would be embedded in  
174 its subsequent pursuit behavior. We tested this by comparing the distribution of the initial deviation  
175 angle,  $\delta_0$ , measured between the hawk's flight velocity and its line-of-sight to the lure at the start  
176 of the simulation, for the different test flight subsets (Fig. 3). Whereas the distribution of  $\delta_0$  was  
177 unimodal with a mode at  $\delta_0 \approx 0^\circ$  for the test flights without obstacles, it was bimodal with modes  
178 at  $\delta_0 \approx \pm 20^\circ$  for the test flights with obstacles (Fig. 3A). Accordingly, the median absolute initial  
179 deviation angle (Fig. 3B) was larger for the test flights with obstacles (21.2°; 95% CI: 19.8°, 23.8°;  
180 n=154 flights) than for those without (11.7°; 95% CI: 9.1°, 13.9°; n=103 flights; see Fig. 3 legend  
181 for exclusions). Hence, whereas the hawks took off towards the lure when there were no obstacles  
182 present, they biased their take-off away from any obstacle that was blocking their path to the lure.

## 187 ***Observed take-off direction bias is sufficient to avoid the first obstacle***

188  
189 We next tested whether this observed bias in take-off direction was necessary and sufficient to  
190 ensure that the hawk's target pursuit subsystem would produce a safe path around the first obstacle.  
191 We checked this by re-running the simulations for the test flights with obstacles under the refined  
192 mixed guidance law, having set the initial deviation angle as  $\delta_0 = 0$  (i.e., having set the simulation  
193 to take off directly towards the lure, despite the presence of an obstacle blocking the way). These  
194 simulations often produced a collision with the first obstacle, even when no collision had been  
195 predicted with  $\delta_0$  set to the value that we observed (Fig. 4). It follows that the hawks' observed bias  
196 in take-off direction was both necessary and sufficient to cause their target pursuit subsystem (Eq.  
197 1) to produce a safe path around the first obstacle. This functional conclusion begs the mechanistic  
198 question of how the hawks selected this take-off bias, which we address in the next section.  
199

## 201 ***Take-off direction bias almost minimizes obstacle clearance at maximum span***

202  
203 Previous research on obstacle avoidance has found that domestic pigeons *Columba livia domestica*  
204 target the centers of gaps between obstacles [8, 9], and that Harris' hawks look directly at the edges  
205 of obstacles they avoid [10]. We therefore hypothesized that the hawks would take off by aiming  
206 at either the nearest edge of the obstacle or the midpoint of the gap between the obstacle and the  
207 wall. We tested this by calculating the initial error angle,  $\eta_0$ , between the hypothesized take-off aim  
208 and the direction of the hawk's flight and compared this to the equivalent error angle for the lure  
209 (i.e., the initial deviation angle  $\delta_0$ ). The median absolute initial error angle was smaller (Fig. 3C)  
210 when the hawk was assumed to have aimed its take-off at either the obstacle edge (median  $|\eta_0|$ :  
211 16.6°; 95% CI: 15.0, 18.6) or the gap center (median  $|\eta_0|$ : 16.1°; 95% CI: 14.4, 17.6) rather than  
212 the lure (median  $|\delta_0|$ : 21.2°; 95% CI: 19.8°, 23.8°). However, the initial error angle was smaller  
213 again if the hawk was assumed to have aimed for a clearance of approximately one wing length  
214 (0.5 m) from the obstacle edge (median  $|\eta_0|$ : 8.3°; 95% CI: 6.2°, 10.7°), with the median absolute  
215 error angle,  $|\tilde{\eta}|$ , reaching a global minimum of 5° assuming a targeted clearance of 0.6 m on  
216 approach to the first obstacle (Fig. 5A,C). This makes sense, because aiming at the edge of an  
217 obstacle leaves no clearance and aiming at the center of a gap leaves more clearance than is  
218 necessary for a gap larger than the wings' span. We conclude that the hawks biased their take-off  
219 direction to turn tightly around the obstacle without having to close their wings, thereby reconciling  
220 any initial conflict between obstacle avoidance and target pursuit without limiting their control  
221 authority.  
222

## 224 ***Evidence of mid-course steering correction to avoid obstacles***

225  
226 This initial bias in take-off direction explains how the hawks avoided colliding with the first  
227 obstacle whilst chasing the target, but not how they avoided colliding with the second (Fig. 4). We  
228 therefore looked for evidence of any mid-course steering correction by comparing the time history  
229 of the median prediction error  $\tilde{\epsilon}(t)$  under the refined mixed guidance law for the  $n=154$  test flights  
230 with obstacles and the  $n=106$  test flights without (Fig. 6). Because the initial conditions of each  
231 simulation were matched to those we had measured,  $\tilde{\epsilon}(0) = 0$  by definition. Thereafter, the  
232 simulations deviate from the measured trajectories, but do so to a greater extent when obstacles are  
233 present (Fig. 2B,C). This difference is consistent with the supposition that the hawks made mid-  
234 course steering corrections for obstacle avoidance that the simulations under Eq. 1 alone do not  
235 capture. Moreover, the median prediction error  $\tilde{\epsilon}(t)$  peaks at the times the hawks passed the first  
236 and second obstacles but does not peak at those times for the test flights without obstacles (Fig. 6).

237 The hawks therefore deviated most from the trajectory commanded by their target pursuit  
238 subsystem as they negotiated obstacles, providing clear evidence of mid-course steering correction  
239 to avoid these.

### 242 *Mid-course steering corrections almost minimize obstacle clearance at maximum span*

244 The mechanism we have identified of biasing the initial deviation angle  $\delta$  to steer around an  
245 obstacle blocking the lure at take-off provides a suitable prior model of how target pursuit may be  
246 combined with obstacle avoidance later in the flight. Specifically, we hypothesize that mid-course  
247 steering correction will also involve aiming flight for a clearance of approximately one wing length  
248 from any obstacle blocking the path to the target. To test this hypothesis, we repeated the error  
249 angle analysis that we had undertaken for the first obstacle (Fig. 5A,C), computing how the error  
250 angle,  $\eta$ , varied on approach to the second obstacle in relation to the bird's assumed steering aim  
251 (Fig. 5B,D). Consistent with the results for the first obstacle (Fig. 5A,C), we found that the median  
252 absolute error angle,  $|\tilde{\eta}|$ , reached a global minimum of  $3^\circ$  when the hawks were assumed to aim for  
253 a clearance of 0.65 m from the obstacle (Fig. 5B,D). This minimum was reached 4 m from the  
254 second row of obstacles (Fig. 5B), so the hawks appear to have made a mid-course steering  
255 correction by the time they were within 4 m of the second obstacle. Our results therefore suggest a  
256 parsimonious model of obstructed pursuit in Harris' hawks comprising: (i) a target pursuit  
257 subsystem that implements the same mixed guidance law used in unobstructed pursuit (Eq. 1 with  
258  $N = 0.75$ ,  $K = 1.25 \text{ s}^{-1}$  and  $\tau = 0.01 \text{ s}$ ); and (ii) an obstacle avoidance subsystem that aims for a  
259 clearance of just over one wing length (0.65 m) from the edge of an upcoming obstacle when at  
260 close range (within 4 m). It remains for us to determine whether this model of obstacle avoidance  
261 is implemented in open- or closed-loop.

### 264 *Obstacle avoidance in open versus closed loop*

266 Avoiding obstacles by aiming flight at a clearance lends itself well to open-loop steering correction,  
267 which is the simplest way in which the intermittent demands of obstacle avoidance may be  
268 combined with the continuous demands of target pursuit. Under this hypothesis, a one-off steering  
269 correction would be made at some threshold distance (or time to collision) from an upcoming  
270 obstacle, perturbing the pursuer's deviation angle  $\delta$  so that the continuation of its pursuit begins  
271 with the pursuer heading for a clearance of approximately one wing length from the near edge of  
272 the obstacle. In contrast, previous studies of obstacle avoidance in pigeons [8, 9] have modelled  
273 this as a closed loop steering behavior, treating the gap between obstacles as a goal towards which  
274 the bird steers under Eq. 1 or some variant thereof. Superposing the resulting steering command  
275 with that of a target pursuit subsystem would result in a composite steering command representing  
276 a continuous compromise between target pursuit and obstacle avoidance. Provided the tuning of the  
277 guidance parameters is similar for both subsystems, their composite steering command is  
278 economically modelled by redefining the target of Eq. 1 as the point midway between the lure and  
279 the gap. This simple approach ensures that we continue to fit only three guidance parameters in the  
280 analysis of closed loop steering that follows.

### 283 *No evidence of steering in closed loop to avoid obstacles*

285 To test whether there was evidence for closed-loop steering to avoid obstacles, we re-fitted the  
286 parameters of the mixed guidance law to the  $n=111$  obstacle test flights on which the hawk

287 intercepted the target after passing the second obstacle, redefining the target of Eq. 1 as the point  
288 midway between the lure and a clearance of 0.6 m from the near-edge of the second obstacle. As  
289 before (Fig. 2B,C), we matched the initial conditions of the simulations to those we had measured.  
290 For comparison, we also fitted the simulations treating either the lure or the assumed clearance from  
291 the obstacle as the target of Eq. 1. In each case, we only fitted the simulations as far as the second  
292 row of obstacles, to avoid the need to redefine the target at this point. The prediction error was  
293 smallest for the simulations treating the lure as the target ( $\tilde{\epsilon} = 0.13$  m; 95% CI: 0.12, 0.16 m),  
294 largest for the simulations treating the assumed 0.6 m clearance as the target ( $\tilde{\epsilon} = 0.21$  m; 95% CI:  
295 0.20, 0.26 m), and intermediate for the model targeting the point midway between them ( $\tilde{\epsilon} =$   
296 0.17 m; 95% CI: 0.16, 0.19 m). This analysis therefore provides no evidence of closed-loop steering  
297 towards the gap between the obstacles, although it does not exclude the possibility that some other  
298 mechanism of closed-loop obstacle avoidance was in operation.

### 301 *Evidence of steering in open loop to avoid obstacles*

302  
303 We are left with the hypothesis that Harris' hawks pursue targets through clutter under the mixed  
304 guidance law identified above, but that they avoid upcoming obstacles by making open-loop  
305 steering corrections. To model this behavior we: (i) inherited the parameters of the refined mixed  
306 guidance law that we had fitted already (i.e  $N = 0.75$ ,  $K = 1.25 \text{ s}^{-1}$  and  $\tau = 0.01$  s); (ii)  
307 prescribed the initial conditions by aiming take-off for a clearance of 0.6 m from the near-edge of  
308 the first obstacle; and (iii) added a discrete change in flight direction 4 m ahead of the second  
309 obstacle, aiming this for a clearance of 0.6 m from the near-edge of the obstacle closest to the  
310 hawk's flight direction. In cases where the obstacles were spaced less than 1.2 m apart, such that  
311 aiming for a clearance of 0.6 m from one would have brought the bird closer than 0.6 m to the other,  
312 we aimed this change in flight direction at the center of the gap between them. We used this model  
313 to simulate the  $n=111$  obstacle test flights on which the hawk intercepted the target after passing  
314 the second obstacle (Fig. 7), and found that it fitted these data marginally better ( $\tilde{\epsilon} = 0.18$  m; CI:  
315 0.14, 0.22 m) than the refined mixed guidance law with initial conditions matched to those we had  
316 measured ( $\tilde{\epsilon} = 0.20$  m; CI: 0.15, 0.25 m). Open-loop steering correction therefore enables  
317 successful obstacle avoidance during pursuit under the mixed guidance law and explains our data  
318 closely.

### 321 *Hawks tolerate a low residual collision risk*

322  
323 Although the hawks steered to avoid the obstacles we presented (Fig. 6), the compliant nature of  
324 their wings and the ropes used as obstacles meant they could tolerate occasional collisions, like  
325 those they would experience when brushing past vegetation in their natural environment. Our open-  
326 loop model of obstacle avoidance led to a residual collision risk of 7% across the first and second  
327 obstacles, which closely matches the observed collision rate of 6%. These observed collisions  
328 typically occurred during the final strike maneuver, which involved raising the wings dorsally  
329 whilst extending the legs ventrally and may therefore have compromised the birds' ability to  
330 maneuver around obstacles during a strike.

### 333 *Target overshoot during the final strike maneuver*

334  
335 The longest test-flight trajectories that we recorded ended with the hawk overshooting the lure and  
336 making a hairpin turn to catch it. This behavior was not captured by the refined mixed guidance

337 law alone (Fig. 2B,C), which reflects the fact that our simulations typically reached the lure before  
338 the real bird did (i.e. the commanded steering output would have been more effective in reaching  
339 the target than the observed steering output). Adding an open-loop steering correction to avoid the  
340 second obstacle often caused the simulations to overshoot the lure (Fig. 7A), although the recovery  
341 turns commanded by the model were never so tight as the hairpin turns that we observed. Perturbing  
342 the trajectory commanded by the target pursuit subsystem therefore caused our simulations to  
343 overshoot the lure in a lifelike manner. The fact that a similar overshoot was observed on the test  
344 flights without obstacles may therefore suggest that the real birds were either unable to generate an  
345 accurate steering command because of sensor error, or unable to meet this steering demand because  
346 of physical constraint. It is also possible that this overshoot was adaptive, reflecting an aspect of  
347 the control of the final strike maneuver that our guidance simulations do not capture.

## 348 349 350 **Discussion**

351  
352 Although it is possible that other guidance laws [7] might explain our hawks' pursuit behavior as  
353 well as the mixed guidance law we have fitted (Eq. 1), our modelling demonstrates high  
354 repeatability in the guidance parameters fitted across hundreds of flights collected under varying  
355 experimental conditions (Fig. 2B,C), including different studies on different individuals [1]. Such  
356 quantitative repeatability is rare in behavioral studies, and presumably reflects both the goal-  
357 directed nature of the task and the accuracy of the kinematic measurements used to describe it. In  
358 summary, we find that pursuit behavior in Harris' hawks is well modelled by assuming that their  
359 turn rate  $\dot{\gamma}$  is commanded by feeding back both the angular rate  $\dot{\lambda}$  of their line-of-sight to the target,  
360 and the deviation angle  $\delta$  between their flight direction and line-of-sight to the target. This target  
361 pursuit subsystem serves to drive the pursuer's deviation angle  $\delta$  to zero, leading to a tail-chase that  
362 promotes implicit obstacle avoidance if their target follows a safe path through clutter (Fig. 2A). In  
363 addition, we find that Harris' hawks bias their take-off direction (Fig. 3) and make mid-course  
364 steering corrections (Fig. 6) that perturb the deviation angle  $\delta$  when a collision is imminent (Fig.  
365 5), thereby implementing explicit obstacle avoidance (Fig. 7). This obstacle avoidance subsystem  
366 is well modelled by assuming that the hawks make a discrete steering correction when they  
367 encounter an obstacle blocking their path at close range, aiming for a clearance of just over one  
368 wing length from its nearest edge. Harris' hawks therefore resolve the conflict between obstacle  
369 avoidance and prey pursuit by applying an open-loop bias command that modifies their closed-loop  
370 targeting response in a discontinuous fashion.

## 371 372 373 **Biased guidance enables obstacle avoidance in conjunction with target pursuit**

374  
375 Formally, we have evidence for the following model of obstructed pursuit in Harris' hawks, where  
376 turning is commanded at an angular rate:

$$377$$
$$378 \quad \dot{\gamma}(t) = N\dot{\lambda}(t - \tau) - K\delta(t - \tau) + \begin{cases} b & \text{if } d \leq c_1 \text{ and } \kappa|\eta| \leq c_2 \\ 0 & \text{otherwise} \end{cases}$$
$$379$$
$$380 \quad (2)$$

381 where  $b$  is a bias command,  $d$  is the distance to an upcoming obstacle, and  $\eta$  is the signed error  
382 angle between the pursuer's flight direction and its line-of-sight to the near edge of the obstacle.  
383 Here  $N = 0.75$ ,  $K = 1.25 \text{ s}^{-1}$ , and  $\tau = 0.01 \text{ s}$  are fitted parameters, whilst  $c_1 = 4 \text{ m}$  and  $c_2 =$   
384  $\sin^{-1}(0.6/d)$  define the threshold distance and error angle at which obstacle avoidance is triggered.  
385 The variable  $\kappa$  takes the value  $\kappa = -1$  if the pursuer is on a direct collision course with the obstacle,



with  $\kappa = 1$  otherwise, such that  $c_2$  defines the error angle tolerance with which obstacles are avoided. Our specific implementation of Eq. 2 in Fig. 7A assumes that the bias command is applied in open-loop, over a short time step of duration  $\Delta t$ , such that  $b = \text{sgn } \eta (c_2 - \kappa|\eta|)/\Delta t$  where  $\text{sgn } \eta$  denotes the sign of the error angle and  $|\eta|$  denotes its magnitude at the moment the steering correction is applied. In cases where this steering correction would bring the pursuer's flight direction within the error angle tolerance  $c_2$  of another obstacle, the bias command is modified to target the midpoint of the gap between them. This discontinuous open-loop implementation has a clear behavioral interpretation, in that the bird is assumed to avoid obstacles by making a saccadic flight maneuver analogous to those observed in insects.

It is reasonable to suppose that a similar model might successfully describe obstructed pursuit in insects, given the saccadic nature of their flight maneuvers, but previous work on obstructed pursuit in robber flies *Holcocephala fusca* has instead modelled obstacle avoidance as a closed-loop response [4], with smooth turning commanded as:

$$\dot{\gamma}(t) = N\dot{\lambda}(t - \tau) + \begin{cases} b(t) & \text{if } \dot{\phi} > 0 \text{ and } |\eta - \delta| \leq c_3 \\ 0 & \text{otherwise} \end{cases} \quad (3)$$

where  $\dot{\phi}$  is the looming rate of a narrow object (i.e., the rate of change in its apparent angular width). Here,  $N = 3.6$  and  $\tau = 0.03$  s are fitted parameters, whilst  $c_3 = 43^\circ$  is the half-width of the region of interest about the target within which looming objects are treated as obstacles. Although this is still a discontinuous model of obstacle avoidance in the sense that the bias command  $b$  is only engaged under certain conditions, it is implemented in closed loop with  $b(t) = 0.22\dot{\phi}(t - \tau_b) \text{sgn } \eta(t - \tau_b)$  at  $\tau_b = 0.09$  s. Hence, because the looming rate  $\dot{\phi}$  of an object increases exponentially on approach, so too will the bias command  $b$ , except insofar as it causes the pursuer to turn away from the obstacle. Eq. 3 has some clear disadvantages, in that it would be complex to implement for a dense obstacle field like the one used in our experiments, and commands avoidance of objects that may not necessarily pose a collision risk. It would therefore be of interest to test whether the simpler open-loop model of obstacle avoidance that we have proposed (Eq. 2) can successfully model obstructed pursuit in insects.

## Hypothesised visuomotor implementation of the bias command in hawks

How might the mid-course steering correction that we have modelled for Harris' hawks be implemented physiologically? The bias command  $b$  in Eq. 2 is applied at a distance  $d \leq 4$  m from an upcoming obstacle when  $\kappa|\eta| \leq \sin^{-1}(0.6/d)$ , although it is probable that the birds would have used optic flow cues to estimate their time to collision with the obstacle rather than its absolute range [11]. Under this model, at the threshold distance of  $d = 4$  m (or equivalent time to collision), a steering correction of  $b\Delta t = 9^\circ - \kappa|\eta|$  will be applied if  $\kappa|\eta| \leq 9^\circ$ . Here  $\eta$  is the error angle between the pursuer's flight direction and its line-of-sight to the near edge of the obstacle, and  $\kappa = -1$  if the pursuer is on a direct collision course with the obstacle, with  $\kappa = 1$  otherwise. The most direct way of estimating these quantities is from the optic flow field, which is especially straightforward if gaze is stabilized rotationally such that the pursuer's flight direction coincides with the center of expansion of what is then a pure translational optic flow field. In this case, the condition  $\kappa|\eta| \leq 9^\circ$  is met whenever the center of expansion appears either directly on the obstacle ( $\kappa = -1$ ), or on the background ( $\kappa = 1$ ) within  $9^\circ$  of the edge of the obstacle. Moreover, the error angle  $\eta$  is equal to the angle between the center of expansion and the near edge of the obstacle.

In practice, most visually guided pursuers track their target by turning their head, which complicates the interpretation of the optic flow field by combining rotational and translational self-motion components. In an ideal tail-chase, however, the pursuer's flight direction becomes aligned

with the line-of-sight to its target as the deviation angle  $\delta$  is driven towards zero. Hence, another simple heuristic, applicable only in a tail-chase, is to approximate the error angle  $\eta$  as the difference in azimuth between the target and the near edge of the obstacle. Moreover, a recent pilot study [10] of Harris' hawk gaze strategy during obstructed pursuit found that the bird fixated its target at an azimuth of  $\pm 10^\circ$  with respect to the sagittal plane of its head, coinciding with the assumed projection of its left or right temporal fovea. If this anecdotal result generalizes, such that targets are fixated at  $\pm 10^\circ$  on the right (left) temporal fovea when turning to the right (left) around an obstacle, then at the threshold distance of  $d = 4$  m, the steering correction  $b\Delta t = 9^\circ - \kappa|\eta|$  that Eq. 2 demands would be approximately the azimuth of the obstacle's edge with respect to the head's sagittal plane. Equivalently, if the pursuer's gaze were shifted to fixate the obstacle's edge in the head's sagittal plane, as has been observed in birds [12] including Harris' hawks [10], then the amplitude of the required body saccade would be approximately the same as the amplitude of the required head saccade.

### *Applications to autonomous systems*

The model of obstructed pursuit that we have identified for Harris' hawks is closely related to a form of guidance law from missile engineering called biased proportional navigation [13]. This is a modification of the basic proportional navigation guidance law  $\dot{\gamma} = N\dot{\lambda}$  with a bias command  $b$  added such that  $\dot{\gamma} = N\dot{\lambda} + b$ . This is often expressed in the alternative form  $\dot{\gamma} = N(\dot{\lambda} - \dot{\lambda}_b)$ , by making the substitution  $\dot{\lambda}_b = -b/N$ . Typically, the bias command  $b$  is used to modify the agent's underlying targeting response so as to accomplish some other objective, such as optimizing the control efficiency of a rocket [13], causing a missile to attain a required impact angle [14], guiding an autonomous vehicle along a specified path [15], or meeting specific rendezvous conditions in spaceflight [16]. Many different variants of biased proportional navigation have been proposed, with bias commands that may be engaged in either a continuous or discontinuous fashion, and that may be specified in either open or closed loop [17]. Our modelling demonstrates another possible technical application of biased proportional navigation (or its generalization to biased mixed guidance), where the bias command is used to implement obstacle avoidance in conjunction with target pursuit. This approach differs fundamentally from previous studies that have used unbiased proportional navigation to model collision avoidance in birds [9] or autonomous vehicles [18] by treating the clearance from an object as the target of the proportional navigation guidance law itself (i.e. where  $\dot{\lambda}$  is defined as the line-of-sight rate of the clearance). Biased proportional navigation or biased mixed guidance therefore offers a biologically inspired mechanism for resolving the conflict between obstacle avoidance and target pursuit, which could be deployed in drones designed to intercept other drones in clutter.

## **Materials and Methods**

### *Experimental design*

We recorded the flight trajectories of  $N=4$  captive-bred Harris' hawks *Parabuteo unicinctus* pursuing a falconry lure towed along a zigzagging course around a set of pulleys, with or without obstacles present (Fig. 1A). The birds included one 7-year old female (Ruby) that had been included in a related previous study [1], plus three first-year males (Drogon, Rhaegal, Toothless) that had not previously chased a target. A subset of the flights without obstacles are reported and analyzed using a related method elsewhere [7], but the flights with obstacles are reported here for the first time. Each bird usually flew after the lure four times per day, taking off spontaneously from the

485 falconer's gloved fist when the lure began moving. The lure was hidden inside a tunnel at the start  
486 of each test, mimicking a terrestrial prey item being flushed from cover. The lure vanished into  
487 another tunnel if the bird failed to catch it by the end of the course, which motivated the birds to  
488 catch the lure whilst it was still moving.

489 The experiments began with an 8-day training phase to familiarize the hawks with the task  
490 of chasing the lure without obstacles. This yielded a set of  $n=128$  obstacle-free training flights,  
491 following which we introduced obstacles into the environment. We conducted a single day of  
492 obstacle familiarization flights, using an open layout comprising two rows of four ropes. This  
493 yielded a set of  $n=16$  obstacle familiarization flights during which the lure was pulled through the  
494 gaps between the obstacles. We used a different obstacle arrangement for the main test flights: the  
495 first row of test obstacles comprised an impenetrable grille of eight ropes centered on the midline  
496 of the flight hall (Fig. 1B); the second row of test obstacles comprised four pairs of ropes blocking  
497 each of the lure's four possible paths on its way to the last set of pulleys (Fig. 1A). This yielded a  
498 total of  $n=106$  obstacle-free test flights and  $n=154$  obstacle test flights, recorded over 15 days of  
499 trials including 7 days with obstacles, 5 days without obstacles, and 3 days at the start of the period  
500 in which the presence or absence of obstacles was randomized between flights.

501 We used a simplified pulley configuration at the start of the initial training phase, with four  
502 pulleys placed in a diamond-shaped configuration (Pulleys 1-4 in Fig. 1A). This layout produced  
503 two possible lure courses, with an unpredictable bifurcation at the first pulley followed by two  
504 predictable changes in target direction at the next two pulleys. We modified the pulley setup before  
505 the end of the training phase, placing six pulleys in a chevron-shaped configuration (Fig. 1A,B).  
506 This layout produced six possible courses, with two or three unpredictable bifurcations in target  
507 direction, and one predictable change in direction at the last pulley. The lure course and hawk  
508 starting position were randomly assigned before each flight, and we laid dummy towlines to make  
509 it harder for the hawks to anticipate the lure's course (Fig. 1A,B). The speed of the lure was  
510 randomized within the range  $6-8 \text{ m s}^{-1}$  for each flight; at higher speeds, the hawks were unable to  
511 catch the lure before the end of the course. Following the initial training phase, we randomized the  
512 presence or absence of obstacles between test flights. This took considerable time, however, and  
513 was an unnecessary source of stress for the birds, so we subsequently randomized the presence or  
514 absence of obstacles once at the start of each day.

## 515 516 517 *Experimental protocol*

518  
519 The experiments were carried out at the John Krebs Field Station, Wytham, Oxford, UK between  
520 January and March 2018 in a windowless flight hall measuring 20.2 m by 6.1 m, with an eaves-  
521 height of 3.8 m. The flight hall was lit by flicker-free LED up-lights providing approximately 1000  
522 lux of diffuse overhead lighting reflected by white fabric sheets hung from the ceiling to mimic  
523 overcast morning or evening conditions. The walls of the hall were hung with camouflage netting  
524 to provide visual contrast, and small shrubs and trees were placed down the sides of the room to  
525 discourage flight outside of the central test area (Fig. 1B). The hawks were flown individually from  
526 the gloved fist of a falconer positioned in one of three starting positions across the flight hall (Fig.  
527 1A). A falconry lure with a small food reward attached was towed around a series of large pulleys  
528 by two Aerotech linear actuators rigged with a block and tackle system to increase their output  
529 speed (ACT140DL, Aerotech Limited, Hampshire, UK); a drag line pulled along behind the lure  
530 smoothed its path around the pulleys (Fig. 1A). For the experiments with obstacles, we hung jute  
531 ropes (diameter: 0.05 m) from the roof space to the floor to mimic compliant stems or branches,  
532 wrapping them in expanded polystyrene pipe insulation to make them safe in case of collision (Fig.  
533 1B).

534 We reconstructed each flight using 20 motion capture cameras recording at 200 Hz (Vantage  
535 16, Vicon Motion Systems Ltd, Oxford, UK), under stroboscopic 850 nm infrared illumination  
536 outside the visible spectrum of Harris' hawks [19]. Four high-definition video cameras (Vue, Vicon  
537 Motion Systems Ltd, Oxford, UK) recorded synchronized reference video at 120 Hz. The cameras  
538 were mounted on a scaffold at a height of 3 m, spaced around the perimeter of the flight hall to  
539 maximize coverage (Fig. 1A,B). The motion capture system was turned on at least an hour before  
540 commencement of the flight experiments and was calibrated immediately before the first trial by  
541 moving an Active Calibration Wand (Vicon Motion Systems Ltd, Oxford, UK) through the capture  
542 volume. The origin and ground plane of the coordinate system were set by placing the calibration  
543 wand on the floor in the center of the room. Each bird was fitted with two rigid marker templates  
544 (Fig. 1C): a backpack template with four 6.4 mm diameter spherical retroreflective markers  
545 arranged in an asymmetric pattern, attached to a falconry harness (Trackpack Mounting System,  
546 Marshall Radio Telemetry Ltd, Cumbria, UK); and a tail-pack with three 6.4 mm diameter  
547 retroreflective markers, attached to a falconry tail mount (Marshall Aluminium Tail Feather Piece,  
548 Marshall Radio Telemetry Ltd, Cumbria, UK). The birds also wore retroreflective markers attached  
549 directly to the feathers on their head, wings, or tail, but these are not included in the present analysis.  
550 Six 6.4 mm diameter retroreflective markers were attached directly to the lure, with three markers  
551 on either side in a back-to-back arrangement. Each rope obstacle was fitted with 9.5 mm diameter  
552 markers at eye level and floor level.

### 553 554 *Trajectory reconstruction*

555  
556 The three-dimensional (3D) positions of the bird, lure, and obstacle markers were reconstructed  
557 using Nexus software (Vicon Motion Systems Ltd, Oxford, UK), in a coordinate system aligned to  
558 the principal axes of the flight laboratory. Previous work had found that the Vicon software was  
559 not always able to identify which marker was which between frames, owing to marker occlusion  
560 and the small distance between the markers relative to the distance travelled between frames [20].  
561 We therefore used custom-written code in MATLAB (Mathworks Inc, MA, USA) to label the  
562 anonymous markers in the rigid templates. Our first step was to identify markers that remained  
563 stationary through the trial as being obstacle markers. For the remaining markers, we used their  
564 height above the floor to distinguish between markers on the bird and the lure and used a clustering  
565 algorithm to distinguish between markers on the backpack and the tail-pack. We used the centroid  
566 of the backpack and lure as our initial estimate of their respective positions, treating any frames in  
567 which fewer than three markers were detected on the backpack, tail-pack, or lure as missing data.

568  
569 The initial position estimates for the backpack, tail-pack and lure were contaminated by  
570 misidentified markers, which we excluded by removing points falling further than 0.5 m from the  
571 smoothed trajectory obtained using a sliding window mean of 0.05 s span. We then repeated this  
572 sliding window mean elimination on the raw data with extreme outliers excluded, this time using a  
573 distance threshold of 0.075 m. Our next step was to crop the trajectories to begin at the first frame  
574 on which both the bird and lure were visible, and to end at the point of intercept defined as the point  
575 of minimum distance between the bird and lure. We then used cubic interpolation to fill in any  
576 missing data points and fitted a quintic spline to smooth the 3D data, using a tolerance of 0.03 m  
577 for the bird and 0.01 m for the lure. Finally, we double-differentiated the spline functions, which  
578 we evaluated analytically to estimate the velocity and acceleration of the bird and lure at 20 kHz,  
579 resulting in a suitably small integration step size for our simulations.

## 584 *Guidance simulations*

585  
586 As the birds always flew close to the ground plane, our guidance analysis concerns only the  
587 horizontal components of the pursuit. We used the same forward Euler method and MATLAB code  
588 described previously [1] to simulate the hawk's horizontal flight trajectory given the measured  
589 trajectory of the lure. We modelled the hawk's turning using the mixed guidance law in Eq. 1 for a  
590 given set of parameter settings  $N$ ,  $K$ , and  $\tau$ , matching its simulated flight speed to its measured  
591 flight speed. In cases where the hawk's simulated trajectory resulted in an earlier intercept than its  
592 measured trajectory, we matched the continuation of the simulated trajectory to that of the lure up  
593 to the measured point of intercept. By default, we matched the hawk's initial flight direction in the  
594 simulations to that which we had measured. However, we also ran versions of the simulations in  
595 which we re-initialized the hawk's flight direction at take-off or 4 m from the second obstacle, by  
596 directing its flight towards some specified location (see Results). We defined the prediction error  
597 for each flight,  $\varepsilon(t)$ , as the distance between the measured and simulated flight trajectories.

## 598 599 600 *Statistical analysis*

601  
602 We optimized the guidance parameters  $N$ ,  $K$ , and  $\tau$  by minimizing the median of the mean  
603 prediction error,  $\tilde{\varepsilon}$ , over a given subset of flights. We did this using an exhaustive search procedure  
604 for values of  $N$  and  $K$  from 0 to 2 at intervals of 0.05, and for values of  $\tau$  from 0 to 0.09 s in intervals  
605 of 0.005 s. To ensure that we modelled the same section of flight for all values of  $\tau$ , we began each  
606 simulation at 0.09 s after the start of the trajectory. Although we optimized the guidance parameters  
607 for the obstacle and obstacle-free test flights separately at first, we subsequently combined these  
608 subsets, owing to the observed similarity of their best-fitting parameter settings. Because there were  
609 more test flights with obstacles than without, we used a balanced subsampling procedure to avoid  
610 biasing the fitting of the joint model in favor of obstructed pursuit. Specifically, we sampled 80  
611 flights at random from each subset and identified the parameter settings that minimized  $\tilde{\varepsilon}$  over that  
612 sample. We repeated this sampling experiment 100,000 times and took the grand median of the  
613 resulting best-fitting parameter settings as our refined model. We quantified the goodness of fit of  
614 a given guidance model by computing the mean prediction error,  $\bar{\varepsilon}$ , for each flight. We then used a  
615 bias corrected and accelerated percentile method to compute a bootstrapped 95% confidence  
616 interval for the median of the mean prediction error  $\tilde{\varepsilon}$  at the best-fitting parameter settings. We  
617 report bootstrapped 95% confidence intervals for other properties of the flight trajectories where  
618 relevant.

## 619 620 621 *Ethics statement*

622  
623 This work was approved by the Animal Welfare and Ethical Review Board of the Department of  
624 Zoology, University of Oxford, in accordance with University policy on the use of protected  
625 animals for scientific research, permit no. APA/1/5/ZOO/NASPA, and was considered not to pose  
626 any significant risk of causing pain, suffering, damage or lasting harm to the animals.

## References

1. Brighton, C.H. and G.K. Taylor, *Hawks steer attacks using a guidance system tuned for close pursuit of erratically manoeuvring targets*. Nature Communications, 2019. **10**.
2. Jaksic, F.M. and J.H. Carothers, *Ecological, morphological, and bioenergetic correlates of hunting mode in hawks and owls*. Ornithologica Scandinavica, 1985. **16**(3): p. 165-172.
3. Warren, W.H., et al., *Optic flow is used to control human walking*. Nature Neuroscience, 2001. **4**(2): p. 213-216.
4. Fabian, S.T., et al., *Avoiding obstacles while intercepting a moving target: a miniature fly's solution*. Journal of Experimental Biology, 2022. **225**(4).
5. Brighton, C.H., A.L.R. Thomas, and G.K. Taylor, *Terminal attack trajectories of peregrine falcons are described by the proportional navigation guidance law of missiles*. Proc Natl Acad Sci U S A, 2017. **114**(51): p. 13495-13500.
6. Brighton, C.H., et al., *Attack behaviour in naive gyrfalcons is modelled by the same guidance law as in peregrine falcons, but at a lower guidance gain*. J Exp Biol, 2021. **224**(Pt 5).
7. Kempton, J.A., et al., *Visual versus visual-inertial guidance in hawks pursuing terrestrial targets*. bioRxiv, 2022. **2022.12.24.521635**.
8. Lin, H.T., I.G. Ros, and A.A. Biewener, *Through the eyes of a bird: modelling visually guided obstacle flight*. Journal of the Royal Society Interface, 2014. **11**(96).
9. Antolin, N.P.-C. and G.K. Taylor, *Gap selection and steering during obstacle avoidance in pigeons*. J. Exp. Biol., 2022.
10. Miñano, S., et al., *Through hawks' eyes: synthetically reconstructing the visual field of a bird in flight*. Int. J. Comput. Vis., 2023. **in press**.
11. Wang, Y. and B.J. Frost, *Time to collision is signalled by neurons in the nucleus rotundus of pigeons*. Nature, 1992. **356**(6366): p. 236-8.
12. Kress, D., E. van Bokhorst, and D. Lentink, *How lovebirds maneuver rapidly using super-fast head saccades and image feature stabilization*. PLoS One, 2015. **10**(6): p. e0129287.
13. Murtaugh, S.A. and H.E. Criel, *Fundamentals of proportional navigation*. IEEE Spectrum, 1966. **3**(12): p. 75-85.
14. Byung Soo, K., L. Jang Gyu, and H. Hyung Seok, *Biased PNG law for impact with angular constraint*. IEEE Trans. Aerosp. Electron. Syst., 1998. **34**(1): p. 277-288.
15. Erer, K.S., R. Tekin, and M.K. Özgören. *Biased proportional navigation with exponentially decaying error for impact angle control and path following*. in *2016 24th Mediterranean Conference on Control and Automation (MED)*. 2016.
16. Su, W., et al., *A novel biased proportional navigation guidance law for close approach phase*. Chinese J. Aeronaut., 2016. **29**(1): p. 228-237.
17. Erer, K.S., *Biased proportional navigation guidance for impact angle control with extension to three-dimensional engagements*, in *Department of Mechanical Engineering 2015*, Middle East Technical University. p. 174.
18. Han, S.-C., H. Bang, and C.-S. Yoo, *Proportional navigation-based collision avoidance for UAVs*. Int. J. Control Autom. Syst., 2009. **7**(4): p. 553-565.
19. Potier, S., M. Mitkus, and A. Kelber, *High resolution of colour vision, but low contrast sensitivity in a diurnal raptor*. Proc. R. Soc. B, 2018. **285**(1885).
20. KleinHeerenbrink, M., et al., *Optimization of avian perching manoeuvres*. Nature.

## 673 **Acknowledgments**

674  
675 We thank our falconers Mark Parker, Helen Sanders, and Lucy Larkman for their  
676 involvement in the experiments, and our mechanical workshop technician John Hogg for  
677 designing and building the equipment. We thank James Shelton and Natalia Pérez-  
678 Campanero Antolín for helpful conversations.

### 679 **Funding:**

680 This project has received funding from the European Research Council (ERC) under the  
681 European Union's Horizon 2020 research and innovation programme (Grant Agreement No.  
682 682501).

683 JK was supported by a Christopher Welch Scholarship from the University of Oxford.

684 LF and SM were supported by funding from the Biotechnology and Biological Sciences  
685 Research Council (BBSRC) [grant number BB/M011224/1], via the Interdisciplinary  
686 Bioscience Doctoral Training Partnership.

### 687 **Author contributions:**

688 Conceptualization: CHB, JAK, GKT

689 Formal analysis: CHB, JAK, LAF, MKH, SM, GKT

690 Methodology: CHB, JAK, GKT

691 Investigation: CHB, JAK, MKH, SM

692 Visualization: CHB

693 Supervision: GKT

694 Writing—original draft: CHB

695 Writing—review & editing: GKT

696 All authors reviewed and commented on the original draft.

697  
698  
699 **Competing interests:** Authors declare that they have no competing interests.

700 **Data and materials availability:** Supporting data are available at figshare:

701 <https://doi.org/10.6084/m9.figshare.21905211>.

704 **Figures**

705

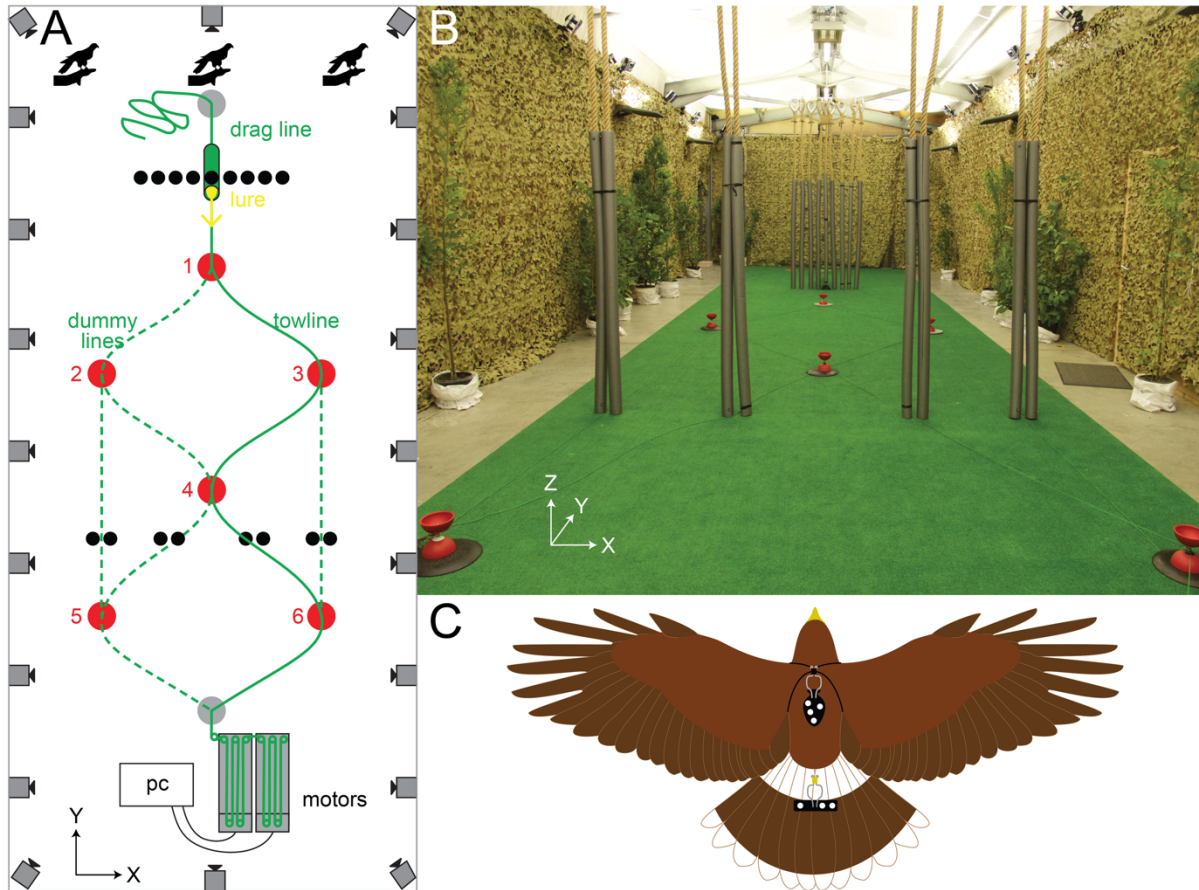

708

709

710

711

712

713

714

715

716

717

718

719

720

721

722

**Figure 1. Overview of experimental setup.** (A) Overhead view of flight hall. Each of the  $N=4$  Harris' hawks flew from one of three alternative starting positions (bird icons), chasing a food lure (yellow arrow) that was pulled forward by a pair of linear motors (grey rectangles) from its starting position on a towline with a trailing drag line (green solid line) that ran around 3 or 4 out of 6 pulleys (red circles). Dummy towlines (green dashed lines) were laid around the remaining pulleys, so that the bird would not be able to anticipate which of the 6 alternative paths the lure would follow. The hawk and lure were tracked by 20 motion capture cameras positioned around the room (camera icons). Ropes (black circles) were hung as obstacles in the configuration shown for the test flights with obstacles. (B) Photo of experimental set-up looking from the linear motors back towards the starting positions of the bird and lure; note the diffuse overhead lighting provided by bouncing light from the 8 LED up-lights positioned around the walls. Shrubs and trees were placed down the sides of the room to provide visual contrast and discourage flight outside of the central test area. (C) Overhead view of Harris' hawk, showing the marker templates worn on the back and tail (black patches) together with the attached retroreflective markers (white circles).



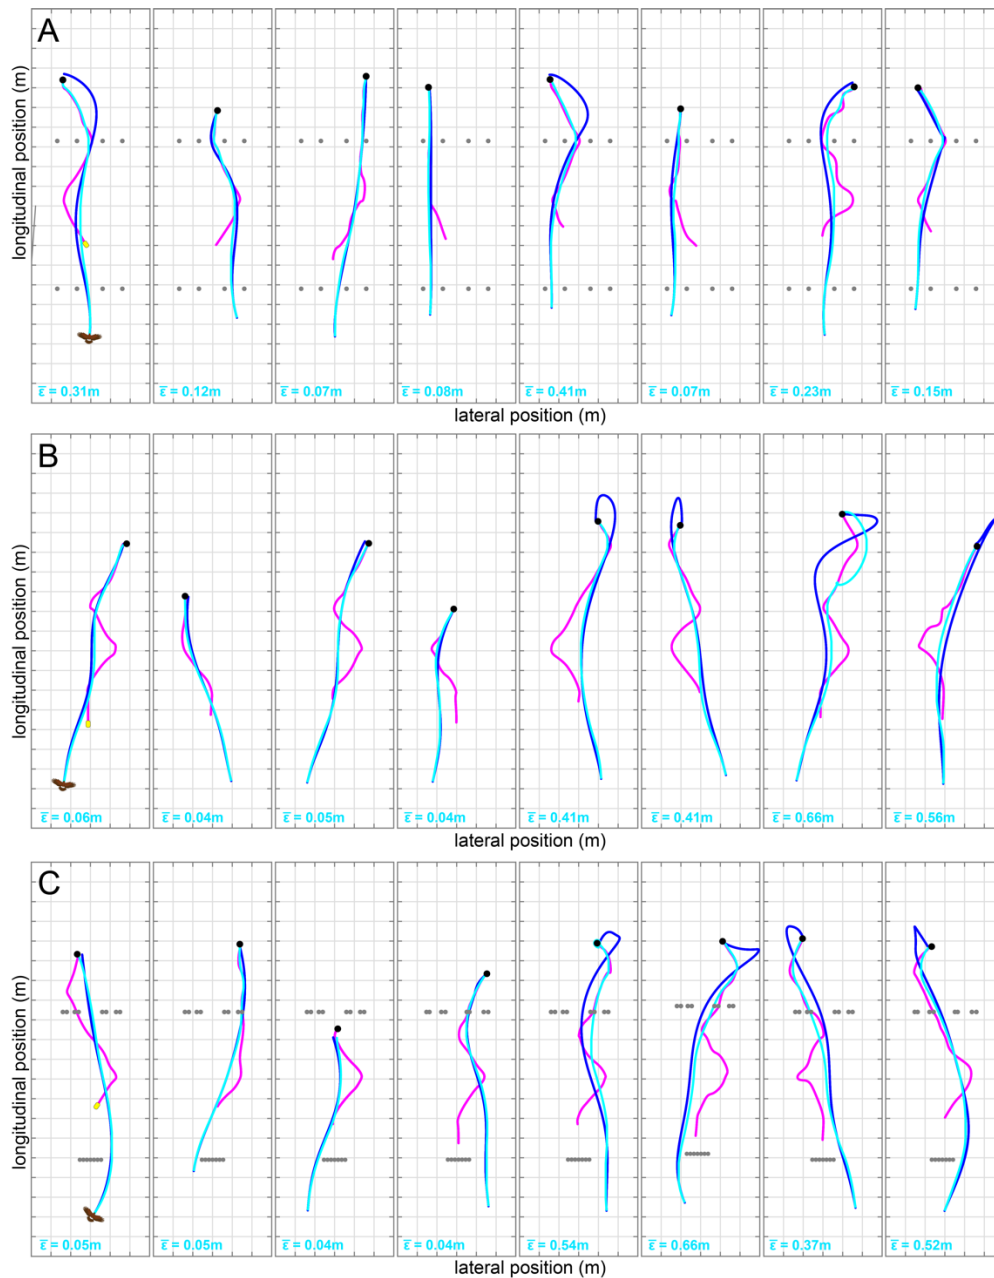

723  
724  
725 **Figure 2. Measured pursuit trajectories of Harris' hawks compared to guidance simulations**  
726 **under the mixed guidance law.** Each panel represents a single flight and plots the hawk's  
727 measured flight trajectory (blue line) in pursuit of the lure (magenta line) up to the point of capture  
728 (black dot). The measured data are compared to a simulation of the hawk's trajectory (cyan line)  
729 under the mixed guidance law (Eq. 1). The displayed values of  $\bar{\epsilon}$  show the mean prediction error  
730 for each simulation. Hanging rope obstacles are plotted as grey dots if present. Grid spacing: 1 m.  
731 **(A)** Guidance simulations inheriting the parameter settings  $N = 0.7$ ,  $K = 1.2 \text{ s}^{-1}$  and  $\tau = 0.09 \text{ s}$   
732 fitted previously [1], shown for the eight longest obstacle familiarization flights. Note that the lure  
733 passes between the obstacles of the second row during these flights, and that the tail-chasing  
734 behavior which the mixed guidance law promotes leads to implicit obstacle avoidance as a result.  
735 **(B,C)** Guidance simulations under the refined mixed guidance law with best-fitting parameters  $N =$   
736  $0.75$ ,  $K = 1.25 \text{ s}^{-1}$  and  $\tau = 0.01 \text{ s}$  fitted jointly to the  $n=106$  obstacle-free test flights (B) and the  
737  $n=154$  obstacle test flights (C). The righthand panels show the four longest flights; the lefthand  
738 panels show the four flights with the lowest mean prediction error relative to the total distance  
739 flown, for flights  $> 9 \text{ m}$  in length.

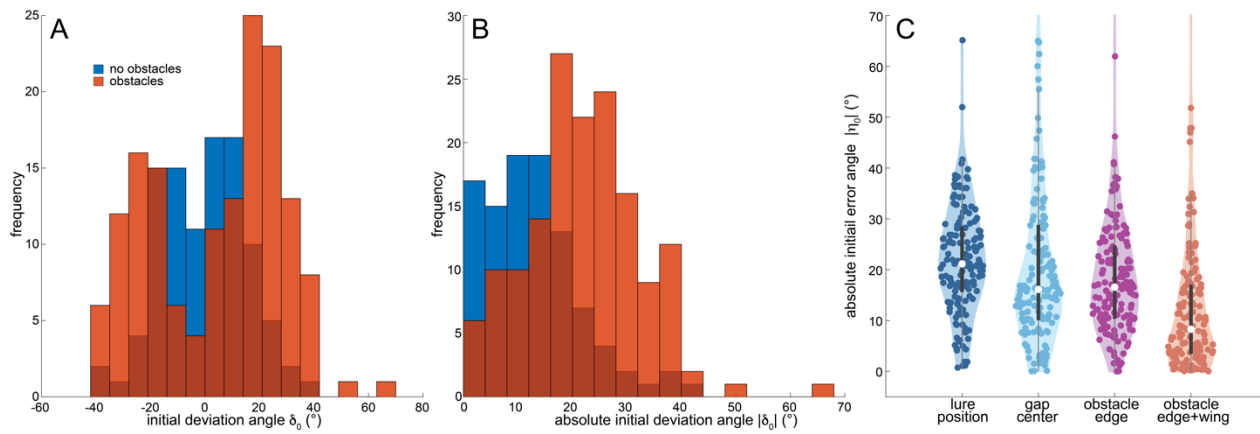

740  
741

742 **Figure 3. Bias in take-off direction with respect to lure.** (A) Histogram of the initial deviation  
743 angle,  $\delta_0$ , defined as the angle between the hawk's flight direction and its line-of-sight to the lure,  
744 sampled at the time  $t = 0$  from which the guidance simulations began. (B) Histogram of the  
745 absolute initial deviation angle,  $|\delta_0|$ . (C) Violin plots of the absolute initial error angle,  $|\eta_0|$ , defined  
746 as the angle between the hawk's initial flight direction and its initial line-of-sight to the target  
747 defined on the  $x$ -axis. In the special case that the target is the lure,  $|\eta_0| \equiv |\delta_0|$ . The three alternative  
748 target definitions include: (i) the nearest edge of the first obstacle; (ii) the center of the gap between  
749 this and the wall; (iii) an intermediate position approximately one wing length (0.5 m) into the gap  
750 from the edge of the obstacle. Data are shown for all  $n=154$  obstacle test flights, and for  $n=103$   
751 obstacle-free test flights, having dropped all 3 flights on which the hawk had already travelled  
752 beyond the location of the first obstacle by the point at which the guidance simulations began.

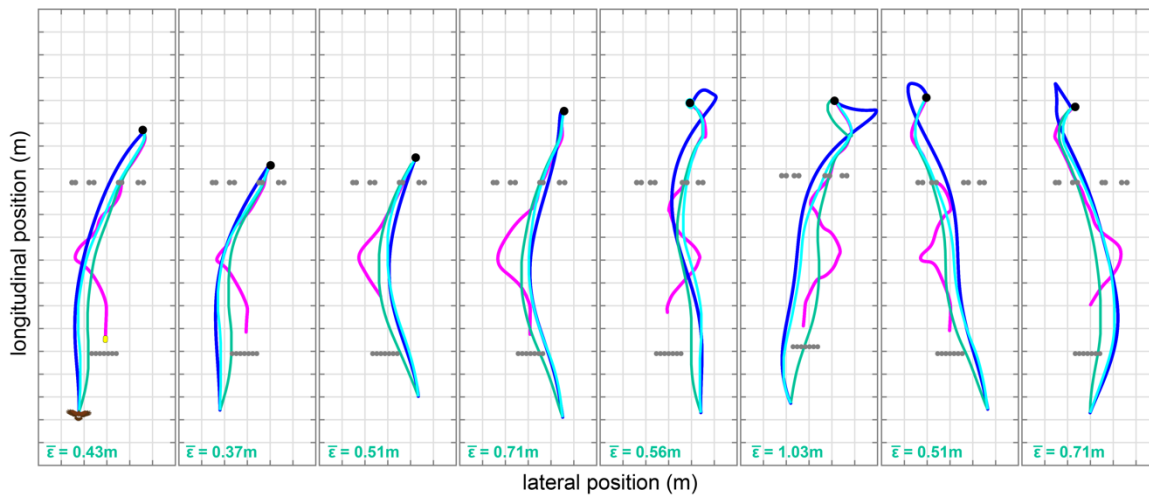

753  
754  
755  
756  
757  
758  
759  
760  
761  
762  
763  
764  
765  
766

**Figure 4. Effect of bias in take-off direction on guidance simulations under the refined mixed guidance law.** Each panel represents a single obstacle test flight and plots the hawk's measured flight trajectory (blue line) in pursuit of the lure (magenta line) up to the point of capture (black dot). The measured data are compared to simulations of the hawk's trajectory under the refined mixed guidance law (Eq. 1), with best-fitting parameters  $N = 0.75$ ,  $K = 1.25 \text{ s}^{-1}$  and  $\tau = 0.01 \text{ s}$ , and: (i) the initial deviation angle,  $\delta_0$ , matched to the value we had measured (cyan line); (ii) with the initial deviation angle,  $\delta_0$ , set so that  $\delta_0 = 0$  (green line), where the displayed values of  $\bar{\epsilon}$  show the mean prediction error for the corresponding simulation. Hanging rope obstacles are plotted as grey dots. The righthand panels show the four longest flights; the lefthand panels show the four flights with the lowest mean prediction error relative to the total distance flown for the simulations with  $\delta_0 = 0$ , for flights  $> 9 \text{ m}$  in length. Grid spacing: 1 m.

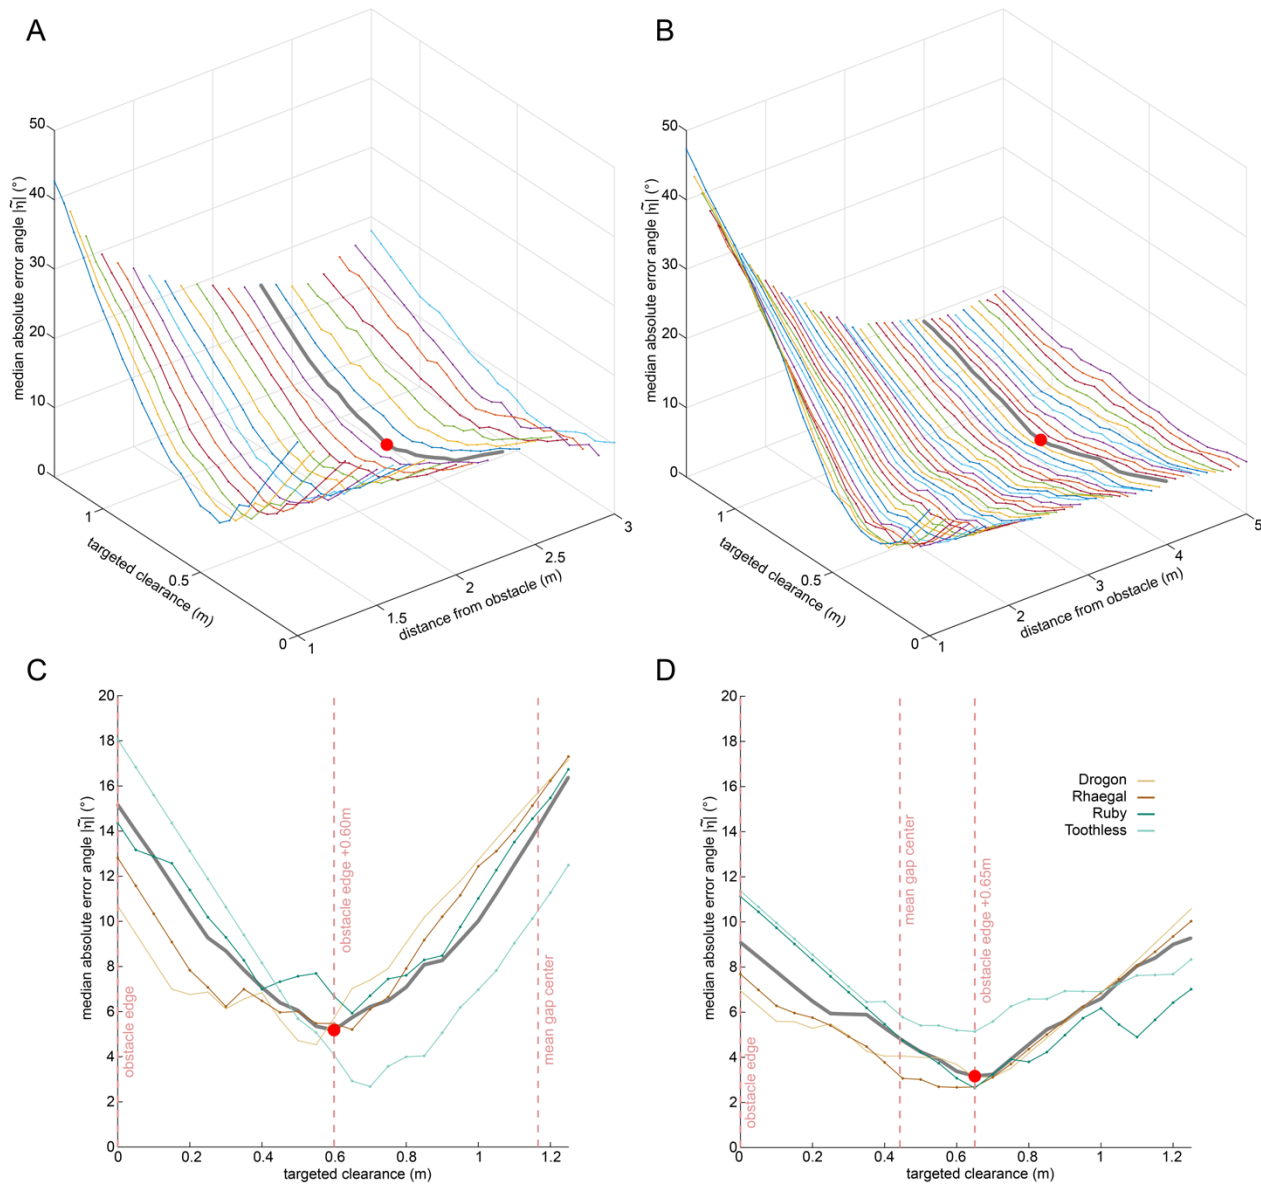

767  
768  
769 **Figure 5. Error angle as a function of targeted clearance from obstacle edge.** Plots of the  
770 median absolute error angle,  $|\bar{\eta}|$ , where the error angle  $\eta$  is defined as the angle between the hawk's  
771 flight direction and its line-of-sight to the clearance, conditional upon the clearance being targeted.  
772 Data are shown for the  $n=111$  obstacle test flights on which the hawk intercepted the target after  
773 passing the second obstacle. **(A,B)** Median absolute error angle  $|\bar{\eta}|$  as a function of targeted  
774 clearance from: (A) the first obstacle; and (B) the second obstacle, plotted at a range of different  
775 distances from the obstacle. The global minimum (red dot) is reached at 2.2 m from the first obstacle  
776 (grey line), shortly after take-off, and at 4.0 m from the second obstacle (thick grey line). **(C,D)**  
777 Median absolute error angle  $|\bar{\eta}|$  as a function of targeted clearance from: (C) the first obstacle; and  
778 (D) the second obstacle, plotted for the specific distance at which the global minimum is reached  
779 (thick grey line). The colored lines plot the same quantities for the subset of flights from each  
780 individual bird. Red dashed lines denote the locations of the targeted clearances referred to in the  
781 main text; note that the exact position of the gap center varies between trials owing to variation in  
782 the placement of the obstacles and is therefore summarized by its mean position across trials.  
783

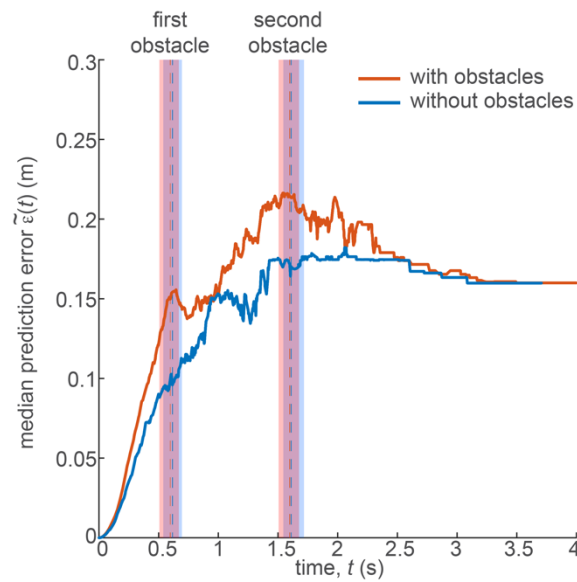

784  
785  
786 **Figure 6. Median prediction error of the refined mixed guidance law against time.** Median  
787 prediction error  $\tilde{\epsilon}(t)$  between the measured flight trajectories and those simulated under the refined  
788 mixed guidance law (Eq. 1), with best-fitting parameters  $N = 0.75$ ,  $K = 1.25 \text{ s}^{-1}$  and  $\tau = 0.01 \text{ s}$ .  
789 Because the initial conditions of each simulation were matched to those we had measured,  $\tilde{\epsilon}(0) =$   
790  $0$  by definition. The simulations deviate from the measured trajectories over time but do so to a  
791 greater extent on the  $n=154$  obstacle test flights (orange) than on the  $n=106$  obstacle-free test flights  
792 (blue). The dashed lines and vertical bars denote the median and interquartile range, respectively,  
793 of the times at which the hawks passed the locations of the first and second obstacles. Note that the  
794 median prediction error peaks at these times for the test flights with obstacles (orange) but not for  
795 the test flights without obstacles (blue), providing evidence of mid-course steering correction to  
796 avoid them.

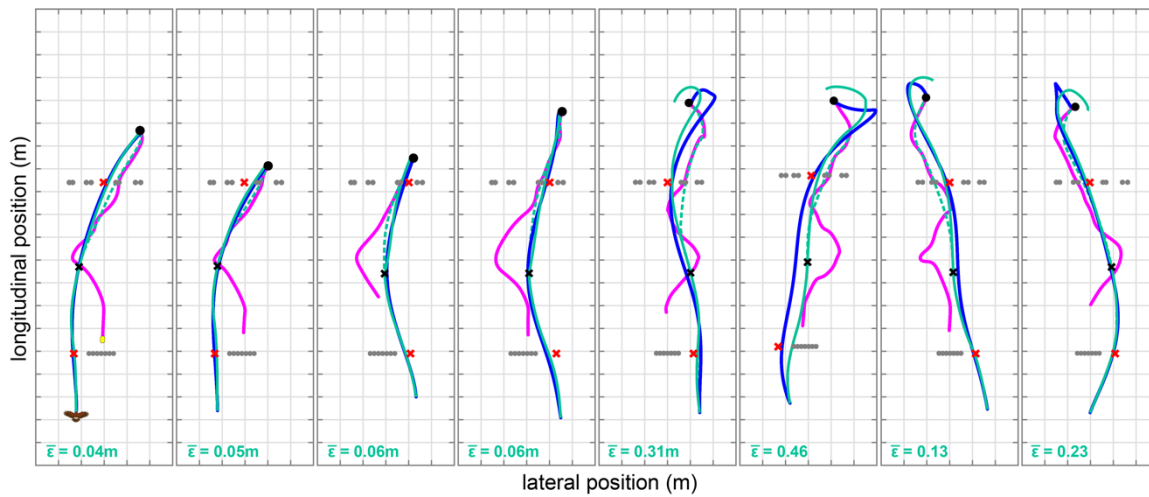

797  
798

799

800

801

802

803

804

805

806

807

808

809

810

811

812

813

814

815

**Figure 7. Measured pursuit trajectories of Harris' hawks compared to guidance simulations under the refined mixed guidance law with open-loop steering correction to avoid obstacles.** Each panel represents a single obstacle test flight and plots the hawk's measured flight trajectory (blue line) in pursuit of the lure (magenta line) up to the point of capture (black dot). The measured data are compared to simulations of the hawk's trajectory (green line) under the refined mixed guidance law (Eq. 1), with best-fitting parameters  $N = 0.75$ ,  $K = 1.25 \text{ s}^{-1}$  and  $\tau = 0.010 \text{ s}$ , assuming discrete application of a deviation angle bias targeting a clearance of 0.6 m from the nearest edge of an upcoming obstacle (red cross), applied once at take-off in respect of the first obstacle, and once at a distance of 4.0 m from the second obstacle (black cross). In cases where the gap between obstacles was  $< 1.2 \text{ m}$ , this mid-course steering correction was assumed to target the center of the gap, instead of the usual clearance of 0.6 m from the nearest obstacle. The displayed values of  $\bar{\epsilon}$  show the mean prediction error for the corresponding simulation. The dashed green line plots the continuation of the simulation without the second steering correction applied, to show the effect of its application on obstacle avoidance. Hanging rope obstacles are plotted as grey dots. The righthand panels show the four longest flights; the lefthand panels show the four flights with the lowest mean prediction error relative to the total distance flown, for flights  $> 9 \text{ m}$  in length. Grid spacing: 1 m.
